# Supplementary material for: Development of a plasmid free CRISPR-Cas9 system for the genetic modification of Mucor circinelloides
Source: PubMed Central journal article supplement (PMC5711797; doi:10.1038/s41598-017-17118-2), 2017-12-01
Supplement: 41598_2017_17118_MOESM1_ESM.pdf [file 41598_2017_17118_MOESM1_ESM.pdf]

**Development of a plasmid free CRISPR-Cas9 system for the genetic modification of *Mucor circinelloides***

Gábor Nagy<sup>1</sup>, Csilla Szabenyi<sup>1,2</sup>, Árpád Csernetics<sup>1,2</sup>, Amanda Grace Vaz<sup>1,2</sup>, Eszter Judit Tóth<sup>1,2</sup>, Csaba Vágvolgyi<sup>2</sup> and Tamás Papp<sup>1,2\*</sup>

<sup>1</sup> MTA-SZTE Fungal Pathogenicity Mechanisms Research Group, Hungarian Academy of Sciences - University of Szeged, Közép fasor 52., H-6726 Szeged, Hungary

<sup>2</sup> Department of Microbiology, Faculty of Science and Informatics, University of Szeged, Közép fasor 52., H-6726 Szeged, Hungary

**Supplementary Table S1.** Susceptibility of the *carB'* mutant and the original strains to hydrogen peroxide.

| Strains                            | concentration of hydrogen peroxide (mM) |      |      |      |      |      |      |      |      |      |      |
|------------------------------------|-----------------------------------------|------|------|------|------|------|------|------|------|------|------|
|                                    | 0.5                                     | 0.45 | 0.4  | 0.35 | 0.3  | 0.25 | 0.2  | 0.15 | 0.1  | 0.05 | 0    |
| MS12                               | 94%                                     | 98%  | 103% | 99%  | 100% | 93%  | 101% | 102% | 102% | 102% | 100% |
| MS12- <i>carB'</i> /1              | 96%                                     | 90%  | 94%  | 95%  | 98%  | 96%  | 102% | 100% | 100% | 99%  | 100% |
| MS12- <i>carB'</i> /2              | 97%                                     | 94%  | 96%  | 105% | 98%  | 98%  | 99%  | 106% | 100% | 96%  | 100% |
| MS12- <i>carB</i> + <i>pyrG</i> /1 | 98%                                     | 94%  | 103% | 99%  | 104% | 99%  | 99%  | 103% | 103% | 98%  | 100% |
| MS12- <i>carB</i> + <i>pyrG</i> /2 | 99%                                     | 90%  | 98%  | 96%  | 96%  | 97%  | 98%  | 104% | 103% | 96%  | 100% |
| CBS277.49                          | 101%                                    | 97%  | 100% | 100% | 101% | 101% | 103% | 100% | 99%  | 95%  | 100% |
| CBS277.49- <i>carB'</i> /1         | 102%                                    | 99%  | 98%  | 99%  | 99%  | 95%  | 101% | 99%  | 97%  | 99%  | 100% |
| CBS277.49- <i>carB'</i> /2         | 93%                                     | 91%  | 94%  | 96%  | 94%  | 94%  | 99%  | 100% | 101% | 99%  | 100% |
